# Supplementary material for: A high-nuclearity complex containing a decanuclear iron(iii)/oxo cage in a football-like structure and rare (R-/S)-hemiacetalate ligands in a butterfly-like format
Source: Royal Society of Chemistry journal article supplement (doi:10.1039/c9ra07556a), 2019-01-01
Supplement: c9ra07556a1.pdf [file c9ra07556a1.pdf]

SUPPORTING INFORMATION:

## A High-Nuclearity Complex Containing A Decanuclear Iron (III)/Oxo Cage in Football-like Structure and Rare (R-/S)-hemiacetalate Ligands in Butterfly-like Format

Chunying Zheng,<sup>a</sup> Mingyue Liang,<sup>a</sup> Haofen Sun,<sup>a</sup> Jiping Ma,<sup>a</sup> Xuejun Bi,<sup>a</sup> Yang Zhao,<sup>a</sup> Weiqiang Tan<sup>\*a</sup> and Hui Li<sup>\*b</sup>

<sup>a</sup>School of Environmental and Municipal Engineering, Qingdao University of Technology, Qingdao, 266580, People's Republic of China. Email: [tanweiqiang@qut.edu.cn](mailto:tanweiqiang@qut.edu.cn) (WeiqiangTan); [3120110530@bit.edu.cn](mailto:3120110530@bit.edu.cn) (Chunying Zheng).

<sup>b</sup>School of Chemistry and Chemical Engineering, Beijing Institute of Technology, Beijing 100081, People's Republic of China. [lihui@bit.edu.cn](mailto:lihui@bit.edu.cn) (Hui Li).

### Contents

|                                                                               |   |
|-------------------------------------------------------------------------------|---|
| 1 <sup>1</sup> H NMR for complex <b>1</b> -----                               | 1 |
| 2 The IR for complex <b>1</b> -----                                           | 2 |
| 3 Synthesis of 2-(dimethoxymethyl)pyridine -----                              | 2 |
| 4 <sup>1</sup> H NMR for 2-(dimethoxymethyl)pyridine-----                     | 3 |
| 5 Physical characterization-----                                              | 3 |
| 6 Selected bond distances (Å) and angles (deg) for the complex <b>1</b> ----- | 3 |

### 1 <sup>1</sup>H NMR for complex **1**

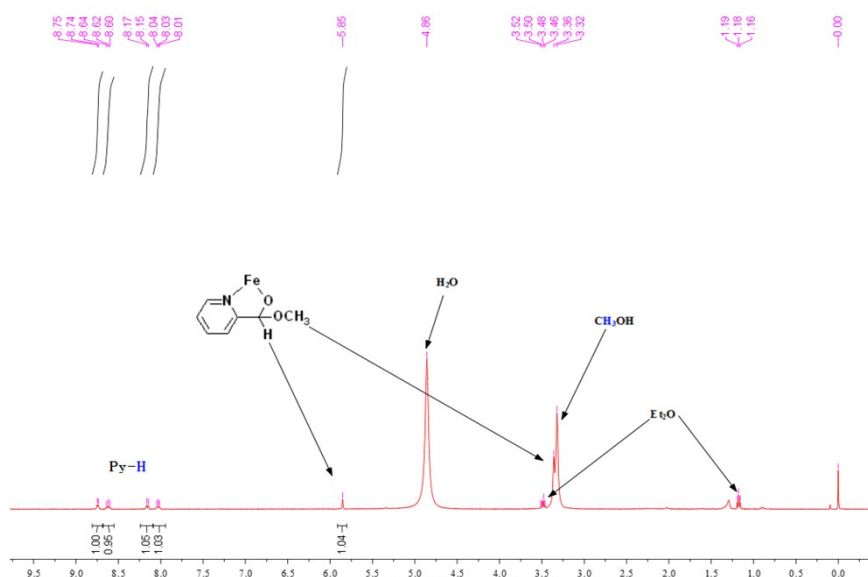

Fig. S1 <sup>1</sup>H NMR (CD<sub>3</sub>OD) for complex **1**.

## 2 The IR for complex 1

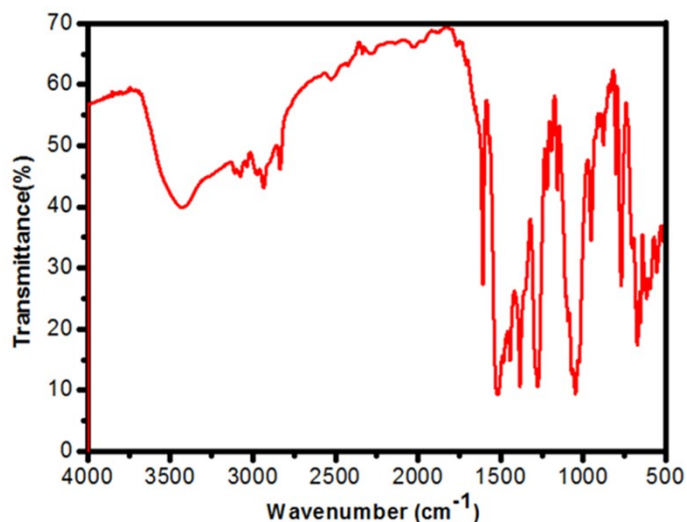

Fig. S2 The IR for complex 1.

## 3 Synthesis of 2-(dimethoxymethyl)pyridine

To a solution of  $\text{Fe}(\text{NO}_3)_3 \cdot 9\text{H}_2\text{O}$  (0.13 g, 0.33 mmol, 10% mmol) in 5 ml methanol was added pyridine-2-aldehyde (0.35 g, 3.26 mmol) at room temperature with stirring. The mixture was stirred for 24 h, and filtered through Celite, concentrated under reduced pressure. The resultant residue was purified by flash silica gel column chromatography with petroleum ether (60-90°C)/ethyl acetate (v/v, 5:1) as the eluent, affording desired product as a light yellow oil (363 mg, 73%).  $^1\text{H}$  NMR ( $\text{CDCl}_3$ , 400 MHz, 23 °C)  $\delta$  8.62 (ddd,  $J = 4.8, 1.7, 0.9$  Hz, 1H), 7.73 (td,  $J = 7.7, 1.8$  Hz, 1H), 7.55 (d,  $J = 7.9$  Hz, 1H), 7.26 (ddd,  $J = 7.5, 4.9, 1.1$  Hz, 1H), 5.39 (s, 1H), 3.41 (s, 7H).

## 4 $^1\text{H}$ NMR for 2-(dimethoxymethyl)pyridine

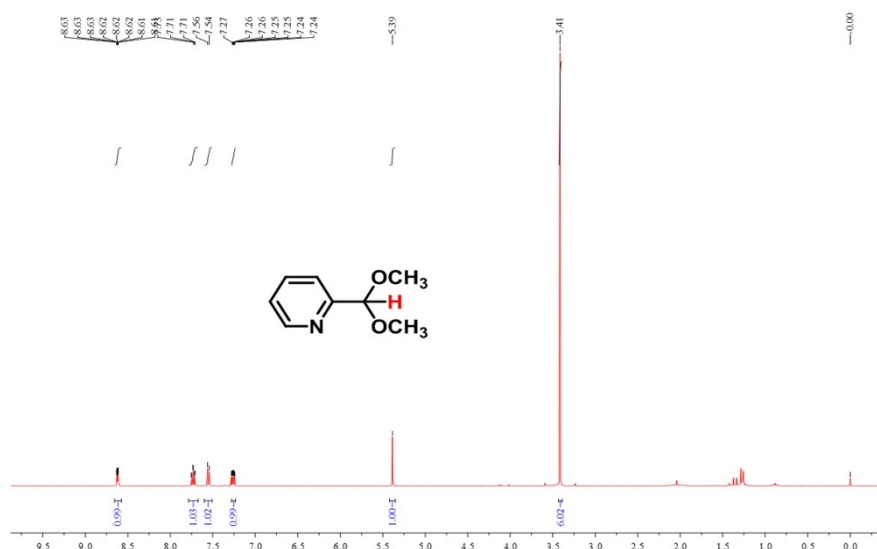

Fig. S3  $^1\text{H}$  NMR ( $\text{CDCl}_3$ ) for 2-(dimethoxymethyl)pyridine.

## 5 Physical characterization

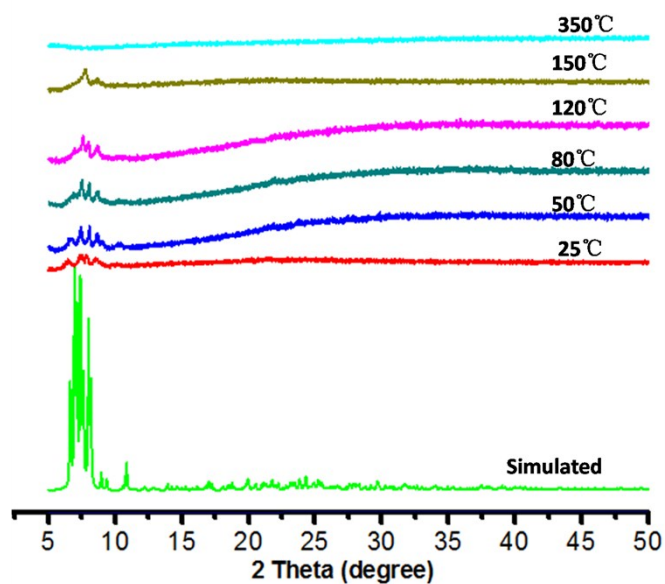

Fig. S4 The varied-temperature PXRD patterns of complex **1** from room temperature to 350 °C.

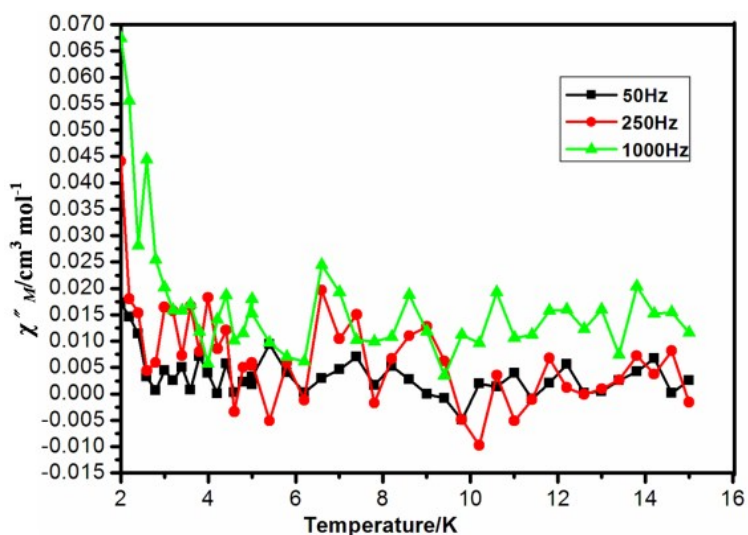

Fig. S5 Temperature dependence of the out-of-phase components ( $\chi''$ ) of ac magnetic susceptibility for **1** in a 3.5 Oe ac field at various ac frequencies.

## 6 Selected bond distances (Å) and angles (deg) for the complex **1**.

Table S1 Selected bond distances (Å) and angles (deg) for the complex **1**.

| Bond        | Bondlength | Bond        | Bondlength |
|-------------|------------|-------------|------------|
| Fe(1)-N(12) | 2.149(4)   | Fe(1)-N(15) | 2.153(4)   |
| Fe(2)-Fe(9) | 2.9764(12) | Fe(3)-O(3)  | 1.930(3)   |
| Fe(3)-N(14) | 2.140(4)   | Fe(3)-N(11) | 2.160(4)   |
| Fe(6)-N(10) | 2.132(5)   | Fe(6)-N(9)  | 2.143(4)   |
| Fe(8)-Fe(9) | 2.9407(13) | Fe(9)-N(8)  | 2.146(5)   |
| Fe(9)-N(13) | 2.143(5)   |             |            |

| <b>Bond</b>       | <b>Bondangle</b> | <b>Bond</b>       | <b>Bondangle</b> |
|-------------------|------------------|-------------------|------------------|
| O(26)-Fe(1)-O(29) | 92.22(14)        | O(26)-Fe(1)-O(12) | 81.67(14)        |
| O(29)-Fe(1)-O(12) | 109.58(15)       | O(26)-Fe(1)-O(9)  | 101.84(16)       |
| O(29)-Fe(1)-O(9)  | 80.71(15)        | O(12)-Fe(1)-O(9)  | 169.14(15)       |
| O(26)-Fe(1)-N(12) | 157.37(16)       | O(29)-Fe(1)-N(12) | 87.97(17)        |
| O(12)-Fe(1)-N(12) | 76.97(17)        | O(9)-Fe(1)-N(12)  | 100.52(18)       |
| O(26)-Fe(1)-N(15) | 93.35(16)        | O(29)-Fe(1)-N(15) | 156.64(16)       |
| O(12)-Fe(1)-N(15) | 93.67(16)        | O(9)-Fe(1)-N(15)  | 75.95(16)        |
| N(12)-Fe(1)-N(15) | 95.39(17)        | O(26)-Fe(1)-Fe(8) | 90.74(10)        |
| O(29)-Fe(1)-Fe(8) | 40.02(11)        | O(12)-Fe(1)-Fe(8) | 148.66(11)       |
| O(9)-Fe(1)-Fe(8)  | 42.13(11)        | N(12)-Fe(1)-Fe(8) | 103.63(13)       |
| N(15)-Fe(1)-Fe(8) | 117.20(12)       | O(26)-Fe(1)-Fe(7) | 40.10(10)        |
| O(29)-Fe(1)-Fe(7) | 92.39(10)        | O(12)-Fe(1)-Fe(7) | 44.31(10)        |
| O(9)-Fe(1)-Fe(7)  | 141.38(12)       | N(12)-Fe(1)-Fe(7) | 117.27(13)       |
| N(15)-Fe(1)-Fe(7) | 106.35(13)       | Fe(8)-Fe(1)-Fe(7) | 115.66(3)        |
| O(3)-Fe(2)-O(21)  | 102.11(15)       | O(3)-Fe(2)-O(17)  | 99.30(14)        |
| O(21)-Fe(2)-O(17) | 102.92(16)       | O(3)-Fe(2)-O(22)  | 90.12(14)        |
| O(21)-Fe(2)-O(22) | 80.48(15)        | O(17)-Fe(2)-O(22) | 168.96(14)       |
| O(3)-Fe(2)-O(30)  | 100.82(15)       | O(21)-Fe(2)-O(30) | 150.91(14)       |
| O(17)-Fe(2)-O(30) | 90.73(16)        | O(22)-Fe(2)-O(30) | 81.82(15)        |
| O(3)-Fe(2)-O(31)  | 159.94(15)       | O(21)-Fe(2)-O(31) | 95.56(14)        |
| O(17)-Fe(2)-O(31) | 85.76(15)        | O(22)-Fe(2)-O(31) | 83.45(14)        |
| O(30)-Fe(2)-O(31) | 59.52(15)        | O(3)-Fe(2)-Fe(9)  | 88.11(10)        |
| O(21)-Fe(2)-Fe(9) | 41.06(11)        | O(17)-Fe(2)-Fe(9) | 143.77(12)       |
| O(22)-Fe(2)-Fe(9) | 41.47(11)        | O(30)-Fe(2)-Fe(9) | 122.86(11)       |
| O(31)-Fe(2)-Fe(9) | 99.29(10)        | O(3)-Fe(3)-O(47)  | 82.23(14)        |
| O(3)-Fe(3)-O(4)   | 104.82(14)       | O(47)-Fe(3)-O(4)  | 172.09(15)       |
| O(3)-Fe(3)-O(25)  | 90.36(14)        | O(47)-Fe(3)-O(25) | 104.41(14)       |
| O(4)-Fe(3)-O(25)  | 79.43(14)        | O(3)-Fe(3)-N(14)  | 94.56(16)        |
| O(47)-Fe(3)-N(14) | 99.12(16)        | O(4)-Fe(3)-N(14)  | 77.00(16)        |
| O(25)-Fe(3)-N(14) | 156.40(15)       | O(3)-Fe(3)-N(11)  | 159.24(15)       |
| O(47)-Fe(3)-N(11) | 77.38(15)        | O(4)-Fe(3)-N(11)  | 95.78(16)        |
| O(25)-Fe(3)-N(11) | 90.92(15)        | N(14)-Fe(3)-N(11) | 92.52(18)        |
| O(26)-Fe(4)-O(23) | 103.57(15)       | O(26)-Fe(4)-O(3)  | 101.76(14)       |
| O(23)-Fe(4)-O(3)  | 103.78(14)       | O(26)-Fe(4)-O(47) | 87.81(14)        |
| O(23)-Fe(4)-O(47) | 167.62(14)       | O(3)-Fe(4)-O(47)  | 78.17(13)        |
| O(26)-Fe(4)-O(27) | 105.78(15)       | O(23)-Fe(4)-O(27) | 86.65(15)        |
| O(3)-Fe(4)-O(27)  | 147.30(15)       | O(47)-Fe(4)-O(27) | 85.55(15)        |
| O(26)-Fe(4)-O(28) | 161.52(14)       | O(23)-Fe(4)-O(28) | 86.46(15)        |
| O(3)-Fe(4)-O(28)  | 90.60(14)        | O(47)-Fe(4)-O(28) | 81.28(14)        |
| O(27)-Fe(4)-O(28) | 58.74(15)        | O(21)-Fe(5)-O(29) | 103.08(16)       |
| O(21)-Fe(5)-O(19) | 100.79(15)       | O(29)-Fe(5)-O(19) | 102.88(14)       |
| O(21)-Fe(5)-O(20) | 89.03(16)        | O(29)-Fe(5)-O(20) | 167.34(16)       |
| O(19)-Fe(5)-O(20) | 78.04(14)        | O(21)-Fe(5)-O(46) | 102.5(2)         |

---

|                    |            |                    |            |
|--------------------|------------|--------------------|------------|
| O(29)-Fe(5)-O(46)  | 88.99(19)  | O(19)-Fe(5)-O(46)  | 150.67(19) |
| O(20)-Fe(5)-O(46)  | 84.74(18)  | O(21)-Fe(5)-O(34)  | 159.22(16) |
| O(29)-Fe(5)-O(34)  | 86.31(17)  | O(19)-Fe(5)-O(34)  | 94.98(17)  |
| O(20)-Fe(5)-O(34)  | 81.04(17)  | O(46)-Fe(5)-O(34)  | 58.6(2)    |
| O(19)-Fe(6)-O(20)  | 82.61(15)  | O(19)-Fe(6)-O(18)  | 105.51(15) |
| O(20)-Fe(6)-O(18)  | 170.66(14) | O(19)-Fe(6)-O(17)  | 90.18(15)  |
| O(20)-Fe(6)-O(17)  | 105.13(16) | O(18)-Fe(6)-O(17)  | 79.82(15)  |
| O(19)-Fe(6)-N(10)  | 93.23(17)  | O(20)-Fe(6)-N(10)  | 97.99(18)  |
| O(18)-Fe(6)-N(10)  | 77.23(17)  | O(17)-Fe(6)-N(10)  | 156.88(16) |
| O(19)-Fe(6)-N(9)   | 158.58(17) | O(20)-Fe(6)-N(9)   | 76.71(18)  |
| O(18)-Fe(6)-N(9)   | 95.58(17)  | O(17)-Fe(6)-N(9)   | 89.84(17)  |
| N(10)-Fe(6)-N(9)   | 95.12(19)  | O(19)-Fe(7)-O(26)  | 100.76(14) |
| O(19)-Fe(7)-O(25)  | 100.37(15) | O(26)-Fe(7)-O(25)  | 103.34(14) |
| O(19)-Fe(7)-O(12)  | 90.58(15)  | O(26)-Fe(7)-O(12)  | 79.40(14)  |
| O(25)-Fe(7)-O(12)  | 167.89(14) | O(19)-Fe(7)-O(15)  | 98.33(14)  |
| O(26)-Fe(7)-O(15)  | 153.03(14) | O(25)-Fe(7)-O(15)  | 91.68(14)  |
| O(12)-Fe(7)-O(15)  | 81.54(14)  | O(19)-Fe(7)-O(44)  | 156.86(15) |
| O(26)-Fe(7)-O(44)  | 99.20(14)  | O(25)-Fe(7)-O(44)  | 86.21(14)  |
| O(12)-Fe(7)-O(44)  | 81.70(14)  | O(15)-Fe(7)-O(44)  | 59.06(14)  |
| O(19)-Fe(7)-Fe(1)  | 86.22(11)  | O(26)-Fe(7)-Fe(1)  | 40.68(10)  |
| O(25)-Fe(7)-Fe(1)  | 143.74(10) | O(12)-Fe(7)-Fe(1)  | 41.36(9)   |
| O(23)-Fe(8)-O(9)   | 100.17(16) | O(29)-Fe(8)-O(9)   | 81.15(15)  |
| O(23)-Fe(8)-O(24)  | 82.13(16)  | O(29)-Fe(8)-O(24)  | 102.77(16) |
| O(9)-Fe(8)-O(24)   | 175.41(16) | O(23)-Fe(8)-O(43)  | 105.0(2)   |
| O(29)-Fe(8)-O(43)  | 158.7(2)   | O(9)-Fe(8)-O(43)   | 84.35(19)  |
| O(24)-Fe(8)-O(43)  | 91.22(19)  | O(23)-Fe(8)-O(42)  | 165.3(2)   |
| O(29)-Fe(8)-O(42)  | 99.8(2)    | O(9)-Fe(8)-O(42)   | 88.9(2)    |
| O(24)-Fe(8)-O(42)  | 88.1(2)    | O(43)-Fe(8)-O(42)  | 64.2(3)    |
| O(23)-Fe(8)-Fe(9)  | 41.30(10)  | O(29)-Fe(8)-Fe(9)  | 90.65(11)  |
| O(9)-Fe(8)-Fe(9)   | 140.40(12) | O(24)-Fe(8)-Fe(9)  | 42.72(12)  |
| O(43)-Fe(8)-Fe(9)  | 110.43(18) | O(42)-Fe(8)-Fe(9)  | 130.68(17) |
| O(23)-Fe(9)-O(22)  | 107.25(15) | O(23)-Fe(9)-O(21)  | 90.85(14)  |
| O(22)-Fe(9)-O(21)  | 82.13(15)  | O(23)-Fe(9)-O(24)  | 81.70(16)  |
| O(22)-Fe(9)-O(24)  | 169.03(15) | O(21)-Fe(9)-O(24)  | 104.46(17) |
| O(23)-Fe(9)-N(13)  | 90.92(17)  | O(22)-Fe(9)-N(13)  | 77.04(18)  |
| O(21)-Fe(9)-N(13)  | 158.66(18) | O(24)-Fe(9)-N(13)  | 96.84(19)  |
| O(23)-Fe(9)-N(8)   | 157.3(2)   | O(22)-Fe(9)-N(8)   | 95.03(19)  |
| O(21)-Fe(9)-N(8)   | 87.79(17)  | O(24)-Fe(9)-N(8)   | 76.70(19)  |
| N(13)-Fe(9)-N(8)   | 98.5(2)    | O(18)-Fe(10)-O(4)  | 177.16(15) |
| O(18)-Fe(10)-O(17) | 80.66(15)  | O(4)-Fe(10)-O(17)  | 97.85(15)  |
| O(18)-Fe(10)-O(25) | 97.39(14)  | O(4)-Fe(10)-O(25)  | 80.13(14)  |
| O(17)-Fe(10)-O(25) | 89.15(14)  | O(18)-Fe(10)-O(13) | 92.71(17)  |
| O(4)-Fe(10)-O(13)  | 89.01(18)  | O(17)-Fe(10)-O(13) | 171.35(16) |
| O(25)-Fe(10)-O(13) | 97.25(15)  | O(18)-Fe(10)-O(6)  | 90.47(18)  |

---

---

|                   |            |                   |            |
|-------------------|------------|-------------------|------------|
| O(4)-Fe(10)-O(6)  | 92.09(18)  | O(17)-Fe(10)-O(6) | 95.91(17)  |
| O(25)-Fe(10)-O(6) | 171.26(17) | O(13)-Fe(10)-O(6) | 78.50(18)  |
| O(48)-N(2)-O(28)  | 122.3(6)   | Fe(3)-O(47)-Fe(4) | 95.06(14)  |
| Fe(8)-O(29)-Fe(1) | 98.96(16)  | Fe(5)-O(29)-Fe(1) | 122.67(18) |
| Fe(5)-O(29)-Fe(8) | 125.78(19) | Fe(4)-O(26)-Fe(1) | 123.92(17) |

---
